# Supplementary material for: Snapshots of archaeal DNA replication and repair in living cells using super-resolution imaging
Source: PubMed Central journal article supplement (PMC6237752; doi:10.1093/nar/gky829), 2018-09-13
Supplement: gky829_supplemental_files.pdf [file gky829_supplemental_files.pdf]

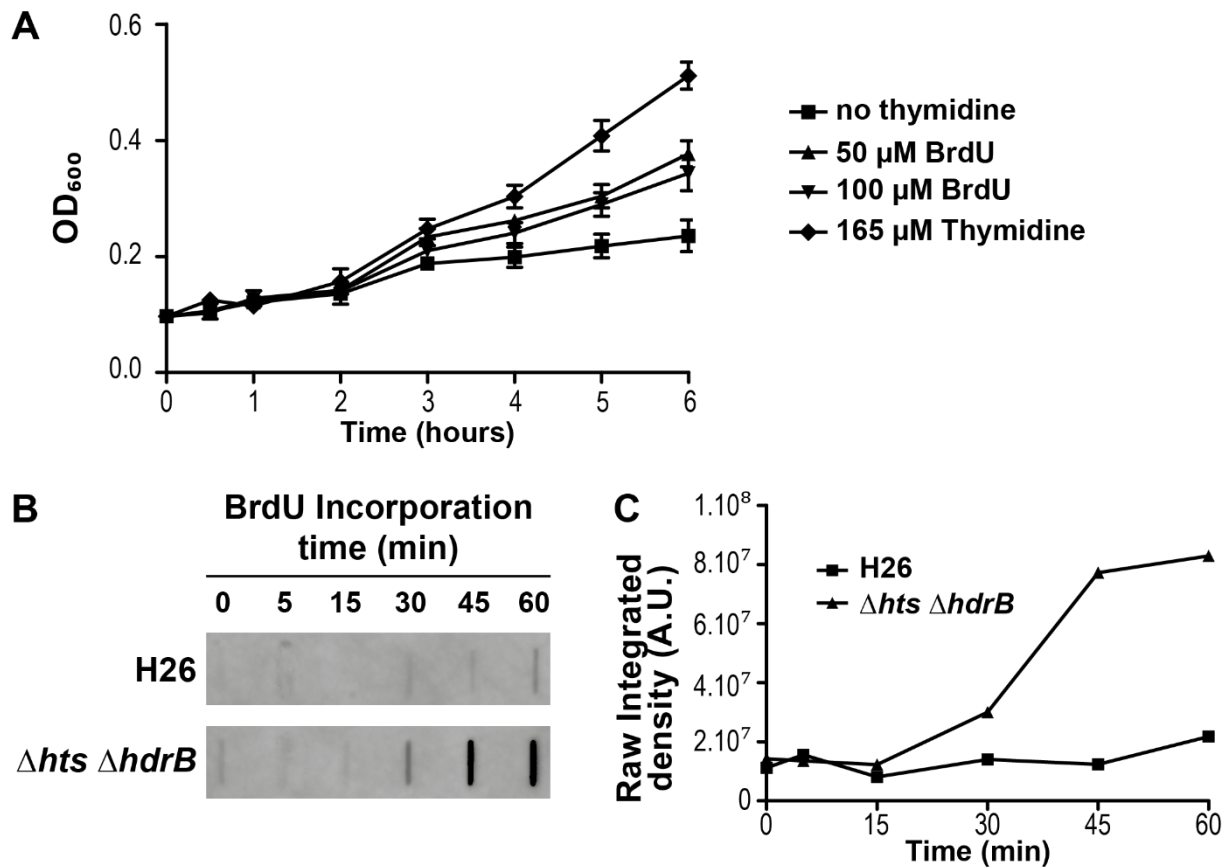

**Figure S1: BrdU incorporation in *H.volcanii*  $\Delta ht s \Delta h d r B$  cells.** (A) Growth curves of  $\Delta ht s \Delta h d r B$  cells in rich media (YPC) (■), or in rich media supplemented with 50  $\mu M$  BrdU (▲), with 100  $\mu M$  BrdU (▼) or with 165  $\mu M$  thymidine (◆). (B) Representative BrdU signal detected by slot-blot analysis of 200ng of genomic DNA after growth in YPC + 100  $\mu M$  BrdU. H26 cells were compared to  $\Delta ht s \Delta h d r B$  cells. (C) Signal quantification of the signal shown panel B using Fiji. “Substract Background” was performed with a rolling ball radius of 25, then signal was measured for each sample using a single-sized ROI.

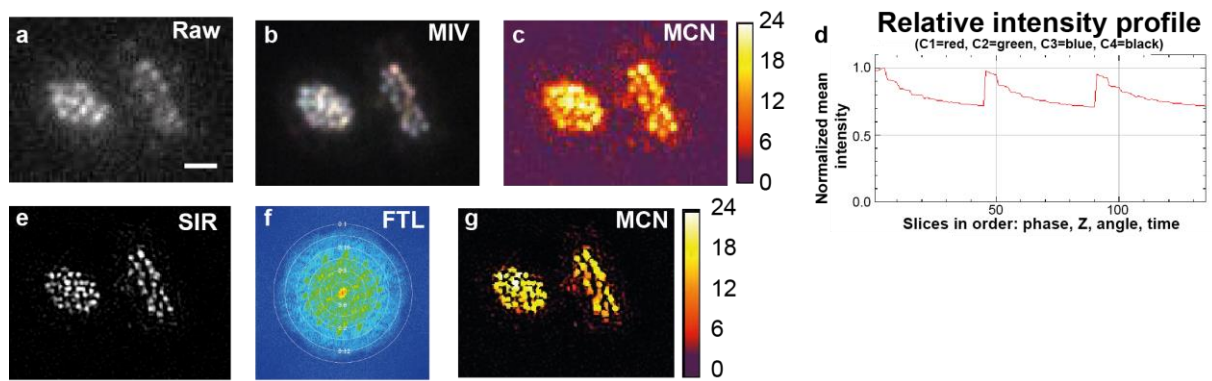

**Figure S2: SIMcheck output for raw (a-d) and SIM reconstructed (e-g) data.** Scale bar 1.0  $\mu\text{m}$ . (a) Representative image from a raw 3D-SIM data. (b) Output image MIV (Motion and illumination variation) indicating motion stability and evenness of the illumination. (c) Final representation of a heatmap of local modulation of the contrast-to-noise ratio (MCNR) used to optimize the acquisition parameters. (d) Relative intensity profiles according to phase, Z and angle indicating the rate of bleaching and the relative intensity of the illumination pattern for each illumination angle. (e) Representative SIM reconstructed image. (f) Fourier spectra display of lateral FFT illustrating the effective spatial resolution. (g) Output image MCN (Modulation contrast to noise) showing the local variations in reconstruction quality.

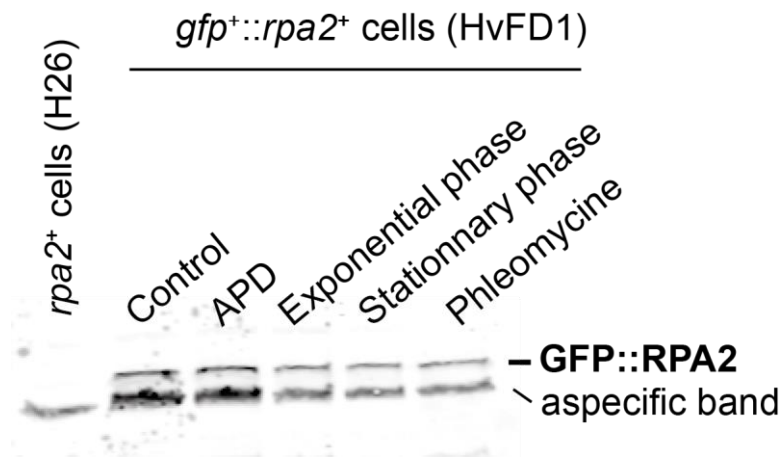

**Figure S3: Western-blot to reveal GFP::RPA2 molecules in crude extract using antibodies against GFP.** For each condition, lysis of an equal quantity of cells was performed in [2M KCl – 10 mM HEPES – pH 7] by sonication. Lysats were centrifuged 1 hour at 4°C. Proteins from supernatants were separated by electrophoresis in denaturing conditions using NuPAGE 4-12% Bis-Tris Protein Gels (ThermoFisher Scientific) following manufacturer instructions. Proteins were transferred on a nitrocellulose membrane and GFP::RPA2 proteins were revealed using a primary antibody against GFP (1/5000) (ORIGENE) and a secondary antibody against rabbit antibodies coupled to IRDye 680 (LICOR). Signal was revealed using a Licor Odyssey Imaging system. A band specific to GFP::RPA2 was revealed with an apparent molecular weight of 120 kDa, higher than the expected molecular weight of 80 kDa, which is often the case with halophilic proteins. Three independent experiments were performed, and results from a representative western blot was shown.

## Figures S4A and S4B

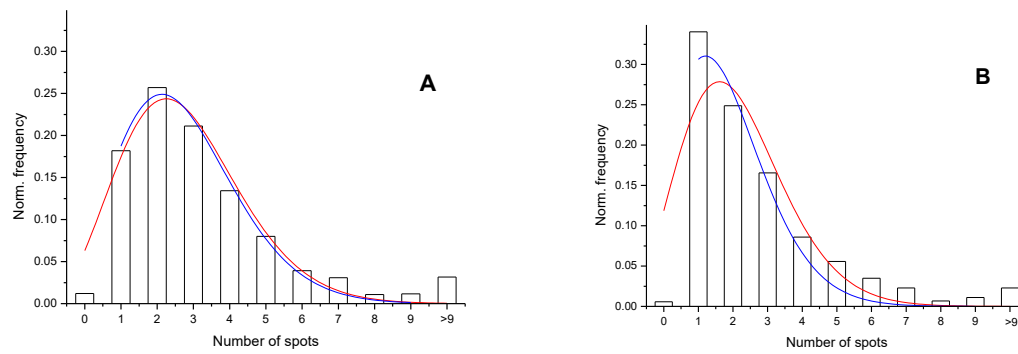

**Figures S4A and S4B:** The observed number of RF (“spots”) fitted using a Poisson function using the average of the distribution as the only fit parameter. In both panels the red plots are fits to points from 0-9 number of spots: for the blue curves the point at 0 number of spots is excluded from the fit. The mean values for the number of spots corresponding to the red and blue curves are  $2.76 \pm 0.12$  and  $2.65 \pm 0.06$  (panel A) and  $2.1 \pm 0.2$  and  $1.73 \pm 0.12$  (panel B). Panels A and B refer to **Figure 2B** of the main manuscript.

## Figures S4C

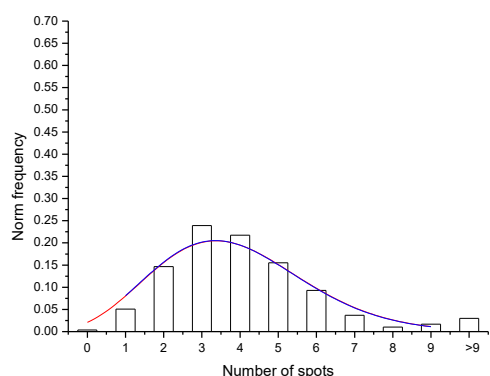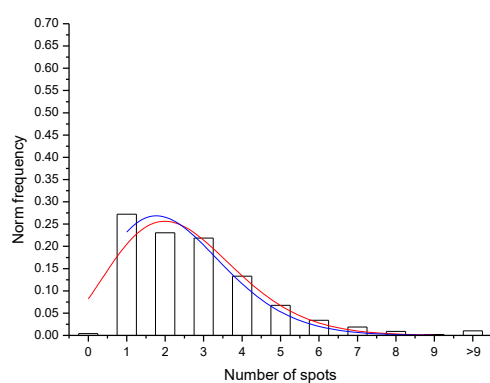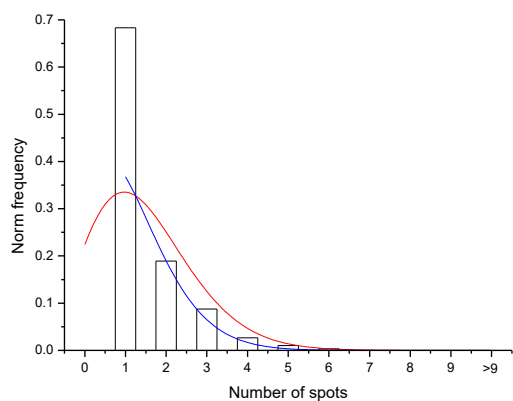

**Figures S4C:** The fits are to a Poisson distribution with only fit parameter the average of the distribution (referring to **Figure 4D** of the main manuscript). In both panels the red plots are fits to points from 0-9 number of spots: for the blue curves the point at 0 number of spots is excluded from the fit. The mean values for the number of spots corresponding to the red and blue curves are  $3.87 \pm 0.15$  and  $3.86 \pm 0.15$  (*upper, no UV treatment*),  $2.5 \pm 0.2$  and  $2.39 \pm 0.11$  ( $50 \text{ J/m}^2$ , *middle*) and  $1.5 \pm 0.4$  and  $1.0 \pm 0.5$  ( $100 \text{ J/m}^2$ , *lower*).

**Supplementary Table S1.** Oligonucleotides used during this work.

| Primer                                                                                                        | Sequence (5' to 3')                                      | Comments/use                                                                                              |
|---------------------------------------------------------------------------------------------------------------|----------------------------------------------------------|-----------------------------------------------------------------------------------------------------------|
| <b>Construction of <i>H. volcanii</i> <i>gfp</i><sup>+</sup>::<i>rpa2</i><sup>+</sup> strain</b>              |                                                          |                                                                                                           |
| RL129                                                                                                         | CGACGCGGAGAACTGCGCC                                      | Amplification of the up-stream region of <i>rpa2</i>                                                      |
| RL130                                                                                                         | <u>AGTTCCTCGCCTTTTCGACATCAGGCGTCACCTCCC</u><br>GG        | Amplification of the up-stream region of <i>rpa2</i> , underlined sequence is complementary to <i>gfp</i> |
| RL85bis                                                                                                       | ATGTCGAAAGGCGAGGAACTCTTC                                 | Amplification of <i>gfp</i>                                                                               |
| RL124                                                                                                         | CGACCGGTAGGCGTAGCCGC                                     | Amplification of <i>gfp</i>                                                                               |
| RL131                                                                                                         | <u>GCGGCTACGCCTACCGGTCGATGGGCGTCATCCGG</u><br>GAGG       | Amplification of the 5' region of <i>rpa2</i> , underlined sequence is complementary to <i>gfp</i>        |
| RL132                                                                                                         | AGGTTCTCCTTCGCGCCG                                       | Amplification of the 5' region of <i>rpa2</i>                                                             |
| BSF2                                                                                                          | TTAAGTTGGGTAACGCCAGGG                                    | Screening for fusion construct starting from "white" colonies                                             |
| BSR3                                                                                                          | ACCCAGGCTTTACACTTTATGC                                   | Screening for fusion construct from "white" colonies                                                      |
| RL141                                                                                                         | GCCAGTGTGGACTTCGACCG                                     | Confirmation of the <i>gfp</i> <sup>+</sup> :: <i>rpa2</i> <sup>+</sup> at the native locus               |
| RL165                                                                                                         | GACGGTTACGATGTGAACTCC                                    | Confirmation of the <i>gfp</i> <sup>+</sup> :: <i>rpa2</i> <sup>+</sup> at the native locus               |
| <b>Construction of <i>H. volcanii</i> <math>\Delta</math><i>hts</i> <math>\Delta</math><i>hdrB</i> strain</b> |                                                          |                                                                                                           |
| RL208                                                                                                         | CGACGGTATCGATAAGCTTGATATCGAATTGGCGA<br>GTCGCGACGCTCGGGC  | Upstream (US) region of <i>hts</i> <i>hdrB</i> operon                                                     |
| RL209                                                                                                         | TTTGTA TCCCACTCGCCCCGAGTTACTCATGAGAG<br>GTGCCCTGGTTGGGTG | Upstream (US) region of <i>hts</i> <i>hdrB</i> operon                                                     |
| RL210                                                                                                         | GACGACCAACACCCAACCAGGGCACCTCTCATGA<br>GTA ACTCGGGCGAGTGG | Downstream (DS) region of <i>hts</i> <i>hdrB</i> operon                                                   |
| RL211                                                                                                         | AAAAGCTGGAGCTCCACCGCGGTGGCGGCCACGC<br>GAGTCTGCGTCGGCTCC  | Downstream (DS) region of <i>hts</i> <i>hdrB</i> operon                                                   |
| RL52                                                                                                          | ATGAGCGGCGAGGAGCTTTCTGG                                  | Preparation of the DIG-labeled probe                                                                      |
| RL53                                                                                                          | TTACTCATCGGATTCCTCCG                                     | Preparation of the DIG-labeled probe                                                                      |

**Supplementary Table S2.** Generation times of *H. volcanii* strains (in hours).

| Pairwise measurements | <i>rpa2</i> <sup>+</sup> | <i>gfp</i> <sup>+</sup> :: <i>rpa2</i> <sup>+</sup> |
|-----------------------|--------------------------|-----------------------------------------------------|
| 1                     | 2.08                     | 2.87                                                |
| 2                     | 1.81                     | 1.87                                                |
| 3                     | 1.42                     | 1.90                                                |
| 4                     | 1.65                     | 2.37                                                |
| 5                     | 2.49                     | 2.13                                                |
| average ± SD          | 1.9 ± 0.4                | 2.2 ± 0.4                                           |
